# Supplementary material
Source: HighWire-hosted journal article supplement (https://bibliotheek.ehb.be/content/suppl/2023/07/14/10.1.e001738)
Supplement: bmjresp-2023-001738supp001_data_supplement.pdf [file bmjresp-2023-001738supp001_data_supplement.pdf]

**Supplemental 1.** JBI critical appraisal for included studies. \* represents questions which recorded disagreement on first review between two authors**Analytical Cross-sectional studies (answers: Yes, No, Unclear, Not Applicable (NA))**

| Reference     | Were the criteria for inclusion in the sample clearly defined? | Were the study subjects and the setting described in detail? | Was the exposure measured in a valid and reliable way? | Were objective, standard criteria used for measurement of the condition? | Were confounding factors identified? | Were strategies to deal with confounding factors stated? | Were the outcomes measured in a valid and reliable way? | Was appropriate statistical analysis used? |
|---------------|----------------------------------------------------------------|--------------------------------------------------------------|--------------------------------------------------------|--------------------------------------------------------------------------|--------------------------------------|----------------------------------------------------------|---------------------------------------------------------|--------------------------------------------|
| <sup>46</sup> | Yes                                                            | Yes                                                          | Yes*                                                   | Yes                                                                      | Yes                                  | Yes                                                      | Yes                                                     | Yes                                        |
| <sup>36</sup> | Yes                                                            | Yes                                                          | NA*                                                    | Yes                                                                      | Yes                                  | Yes                                                      | Yes                                                     | Yes                                        |
| <sup>39</sup> | Yes                                                            | Yes                                                          | Yes                                                    | Unclear*                                                                 | Yes*                                 | Unclear*                                                 | Yes                                                     | Yes*                                       |
| <sup>37</sup> | Yes                                                            | Yes                                                          | NA*                                                    | Yes                                                                      | Yes                                  | Yes                                                      | Yes                                                     | Yes                                        |
| <sup>32</sup> | Yes                                                            | Yes                                                          | NA*                                                    | Yes                                                                      | Yes                                  | Yes                                                      | Yes                                                     | Yes                                        |
| <sup>58</sup> | Yes                                                            | Yes                                                          | Unclear*                                               | No                                                                       | Yes                                  | Yes*                                                     | Yes*                                                    | Yes                                        |
| <sup>38</sup> | Yes*                                                           | Yes                                                          | Yes                                                    | Yes                                                                      | No*                                  | No*                                                      | Yes                                                     | No*                                        |

**Cohort studies**

| Reference     | Were the two groups similar and recruited from the same population? | Were the exposures measured similarly to assign people to both exposed and unexposed groups? | Was the exposure measured in a valid and reliable way? | Were confounding factors identified? | Were strategies to deal with confounding factors stated? | Were the groups/participants free of the outcome at the start of the study (or at the moment of exposure)? | Were the outcomes measured in a valid and reliable way? | Was the follow up time reported and sufficient to be long enough for outcomes to occur? | Was follow up complete, and if not, were the reasons to loss to follow up described and explored? | Were strategies to address incomplete follow up utilized? | Was appropriate statistical analysis used? |
|---------------|---------------------------------------------------------------------|----------------------------------------------------------------------------------------------|--------------------------------------------------------|--------------------------------------|----------------------------------------------------------|------------------------------------------------------------------------------------------------------------|---------------------------------------------------------|-----------------------------------------------------------------------------------------|---------------------------------------------------------------------------------------------------|-----------------------------------------------------------|--------------------------------------------|
| <sup>47</sup> | NA*                                                                 | NA*                                                                                          | Yes                                                    | Yes*                                 | Yes*                                                     | Yes                                                                                                        | Yes                                                     | Yes                                                                                     | Yes                                                                                               | NA*                                                       | Yes                                        |
| <sup>7</sup>  | No*                                                                 | Yes*                                                                                         | Yes*                                                   | Yes*                                 | Unclear*                                                 | NA                                                                                                         | Yes                                                     | NA                                                                                      | NA                                                                                                | NA                                                        | No*                                        |
| <sup>8</sup>  | No                                                                  | Yes*                                                                                         | Yes*                                                   | No                                   | No                                                       | No                                                                                                         | Yes*                                                    | Yes*                                                                                    | Unclear*                                                                                          | No*                                                       | Yes*                                       |
| <sup>51</sup> | Yes*                                                                | NA*                                                                                          | Yes                                                    | Yes                                  | Yes*                                                     | No                                                                                                         | Yes                                                     | Yes                                                                                     | Yes                                                                                               | NA                                                        | Yes                                        |
| <sup>40</sup> | Yes*                                                                | Yes                                                                                          | Yes                                                    | NA*                                  | NA*                                                      | Unclear*                                                                                                   | Yes                                                     | Unclear*                                                                                | Unclear*                                                                                          | NA*                                                       | Yes                                        |
| <sup>14</sup> | NA                                                                  | NA                                                                                           | NA*                                                    | Yes                                  | Unclear*                                                 | NA                                                                                                         | Yes                                                     | NA                                                                                      | NA                                                                                                | NA                                                        | Yes                                        |
| <sup>41</sup> | Yes                                                                 | Yes                                                                                          | Yes                                                    | Yes                                  | Yes                                                      | Yes                                                                                                        | Yes                                                     | Yes                                                                                     | Yes                                                                                               | NA                                                        | Yes                                        |
| <sup>48</sup> | No                                                                  | Yes                                                                                          | Yes                                                    | Yes                                  | No*                                                      | NA                                                                                                         | Yes                                                     | Yes                                                                                     | Yes                                                                                               | Yes*                                                      | No                                         |
| <sup>56</sup> | Yes*                                                                | Yes                                                                                          | Yes                                                    | Unclear*                             | Unclear*                                                 | No                                                                                                         | Yes                                                     | Yes                                                                                     | Yes                                                                                               | NA*                                                       | Yes                                        |
| <sup>29</sup> | Yes                                                                 | NA*                                                                                          | Yes*                                                   | Yes*                                 | No*                                                      | NA                                                                                                         | Yes                                                     | NA                                                                                      | NA                                                                                                | NA                                                        | No*                                        |
| <sup>53</sup> | Yes                                                                 | Yes                                                                                          | Yes                                                    | Yes                                  | Yes                                                      | NA*                                                                                                        | Yes                                                     | Yes                                                                                     | Yes                                                                                               | NA*                                                       | Yes                                        |
| <sup>44</sup> | Yes*                                                                | Yes                                                                                          | Yes                                                    | Yes                                  | Yes                                                      | NA*                                                                                                        | Yes                                                     | Yes*                                                                                    | Yes                                                                                               | Yes*                                                      | Yes*                                       |
| <sup>52</sup> | Yes                                                                 | Yes                                                                                          | Yes                                                    | Yes                                  | Yes                                                      | No*                                                                                                        | Yes                                                     | Yes                                                                                     | Yes                                                                                               | NA                                                        | Yes                                        |
| <sup>49</sup> | Yes                                                                 | Yes                                                                                          | Yes                                                    | Yes                                  | No*                                                      | Unclear*                                                                                                   | No*                                                     | NA*                                                                                     | Unclear*                                                                                          | NA*                                                       | Yes*                                       |
| <sup>57</sup> | Yes                                                                 | Yes                                                                                          | Yes                                                    | Yes                                  | Yes*                                                     | NA*                                                                                                        | Yes                                                     | Yes                                                                                     | Yes                                                                                               | NA                                                        | Yes                                        |

|               |     |     |     |     |     |          |     |     |     |    |     |
|---------------|-----|-----|-----|-----|-----|----------|-----|-----|-----|----|-----|
| <sup>54</sup> | Yes | Yes | Yes | Yes | No* | Unclear* | Yes | Yes | Yes | NA | Yes |
|---------------|-----|-----|-----|-----|-----|----------|-----|-----|-----|----|-----|

**Case-Control studies**

| Reference     | Were the groups comparable other than the presence of disease in cases or the absence of disease in controls? | Were cases and controls matched appropriately? | Were the same criteria used for identification of cases and controls? | Was exposure measured in a standard, valid and reliable way? | Was exposure measured in the same way for cases and controls? | Were confounding factors identified? | Were strategies to deal with confounding factors stated? | Were outcomes assessed in a standard, valid and reliable way for cases and controls? | Was the exposure period of interest long enough to be meaningful? | Was appropriate statistical analysis used? |
|---------------|---------------------------------------------------------------------------------------------------------------|------------------------------------------------|-----------------------------------------------------------------------|--------------------------------------------------------------|---------------------------------------------------------------|--------------------------------------|----------------------------------------------------------|--------------------------------------------------------------------------------------|-------------------------------------------------------------------|--------------------------------------------|
| <sup>30</sup> | Yes                                                                                                           | NA*                                            | Yes*                                                                  | Yes                                                          | Yes                                                           | Yes*                                 | Unclear*                                                 | Yes*                                                                                 | Yes*                                                              | Yes                                        |
| <sup>31</sup> | Yes                                                                                                           | Yes                                            | Yes                                                                   | Yes                                                          | Yes                                                           | Yes                                  | Yes                                                      | Yes                                                                                  | NA*                                                               | Yes                                        |
| <sup>42</sup> | No                                                                                                            | Unclear*                                       | No*                                                                   | Yes                                                          | Yes                                                           | Yes*                                 | Yes*                                                     | Yes                                                                                  | Unclear*                                                          | Yes*                                       |
| <sup>43</sup> | Yes*                                                                                                          | Yes*                                           | Yes                                                                   | Yes                                                          | Yes                                                           | Yes                                  | Unclear*                                                 | Yes                                                                                  | Yes                                                               | Yes                                        |
| <sup>45</sup> | Yes                                                                                                           | No                                             | Yes*                                                                  | Yes                                                          | Yes                                                           | Yes                                  | Yes                                                      | Yes                                                                                  | Yes                                                               | Yes                                        |
| <sup>34</sup> | Yes                                                                                                           | Yes                                            | Yes                                                                   | Yes                                                          | Yes                                                           | Yes                                  | Yes                                                      | NA*                                                                                  | NA*                                                               | Yes                                        |
| <sup>33</sup> | Unclear*                                                                                                      | NA*                                            | NA*                                                                   | Yes                                                          | Yes                                                           | Yes*                                 | No*                                                      | NA*                                                                                  | Unclear*                                                          | Yes                                        |

**Quasi-experimental studies**

| Reference     | Is it clear in the study what is the 'cause' and what is the 'effect' (i.e. there is no confusion about which variable comes first)? | Were the participants included in any comparisons similar? | Were the participants included in any comparisons receiving similar treatment/care, other than the exposure or intervention of interest? | Was there a control group? | Were there multiple measurements of the outcome both pre and post the intervention/exposure? | Was follow up complete and if not, were differences between groups in terms of their follow up adequately described and analyzed? | Were the outcomes of participants included in any comparisons measured in the same way? | Were outcomes measured in a reliable way? | Was appropriate statistical analysis used? |
|---------------|--------------------------------------------------------------------------------------------------------------------------------------|------------------------------------------------------------|------------------------------------------------------------------------------------------------------------------------------------------|----------------------------|----------------------------------------------------------------------------------------------|-----------------------------------------------------------------------------------------------------------------------------------|-----------------------------------------------------------------------------------------|-------------------------------------------|--------------------------------------------|
| <sup>59</sup> | Yes*                                                                                                                                 | Unclear*                                                   | Unclear*                                                                                                                                 | Yes                        | Yes                                                                                          | Unclear*                                                                                                                          | Yes                                                                                     | Yes                                       | Yes                                        |
| <sup>60</sup> | Yes*                                                                                                                                 | No                                                         | Unclear                                                                                                                                  | Yes                        | Yes                                                                                          | Unclear                                                                                                                           | Yes                                                                                     | Yes                                       | Yes                                        |

**Economic evaluation**

| Reference | Is there a well-defined question? | Is there comprehensive description of alternatives? | Are all important and relevant costs and outcomes for each alternative identified? | Has clinical effectiveness been established? | Are costs and outcomes measured accurately? | Are costs and outcomes valued credibly? | Are costs and outcomes adjusted for differential timing? | Is there an incremental analysis of costs and consequences? | Were sensitivity analyses conducted to investigate uncertainty in estimates of cost or | Do study results include all issues of concern to users? | Are the results generalizable to the setting of interest in the review? |
|-----------|-----------------------------------|-----------------------------------------------------|------------------------------------------------------------------------------------|----------------------------------------------|---------------------------------------------|-----------------------------------------|----------------------------------------------------------|-------------------------------------------------------------|----------------------------------------------------------------------------------------|----------------------------------------------------------|-------------------------------------------------------------------------|
|-----------|-----------------------------------|-----------------------------------------------------|------------------------------------------------------------------------------------|----------------------------------------------|---------------------------------------------|-----------------------------------------|----------------------------------------------------------|-------------------------------------------------------------|----------------------------------------------------------------------------------------|----------------------------------------------------------|-------------------------------------------------------------------------|

|               |     |     |     |          |      |     |         |      |               |     |     |
|---------------|-----|-----|-----|----------|------|-----|---------|------|---------------|-----|-----|
|               |     |     |     |          |      |     |         |      | consequences? |     |     |
| <sup>61</sup> | Yes | No* | Yes | Unclear* | Yes* | Yes | Unclear | Yes* | Unclear*      | No* | Yes |

Prevalence studies

| Reference     | Was the sample frame appropriate to address the target population? | Were study participants sampled in an appropriate way? | Was the sample size adequate? | Were the study subjects and the setting described in detail? | Was the data analysis conducted with sufficient coverage of the identified sample? | Were valid methods used for the identification of the condition? | Was the condition measured in a standard, reliable way for all participants? | Was there appropriate statistical analysis? | Was the response rate adequate, and if not, was the low response rate managed appropriately ? |
|---------------|--------------------------------------------------------------------|--------------------------------------------------------|-------------------------------|--------------------------------------------------------------|------------------------------------------------------------------------------------|------------------------------------------------------------------|------------------------------------------------------------------------------|---------------------------------------------|-----------------------------------------------------------------------------------------------|
| <sup>55</sup> | Yes                                                                | Yes                                                    | Yes                           | No*                                                          | Yes                                                                                | Yes                                                              | Yes                                                                          | Yes                                         | NA*                                                                                           |
| <sup>35</sup> | Yes                                                                | Yes                                                    | Yes                           | Yes                                                          | Yes                                                                                | Yes                                                              | Yes                                                                          | Yes                                         | NA*                                                                                           |
| <sup>15</sup> | Yes                                                                | Yes*                                                   | No                            | Yes                                                          | Yes                                                                                | Yes                                                              | Yes                                                                          | Yes                                         | Yes                                                                                           |
| <sup>50</sup> | Yes                                                                | Yes                                                    | Yes*                          | Yes                                                          | Yes                                                                                | Yes                                                              | Yes                                                                          | Yes                                         | Yes*                                                                                          |
