# Supplementary material
Source: HighWire-hosted journal article supplement (https://bibliotheek.ehb.be/content/suppl/2023/07/14/10.1.e001738)
Supplement: bmjresp-2023-001738supp002_data_supplement.pdf [file bmjresp-2023-001738supp002_data_supplement.pdf]

**Supplemental 2.** Hoys bias assessment for the 37 included studies. ‘1’ indicates high risk of bias, ‘0’ indicates low risk of bias

| Reference | 1. Was the study's target population a close representation of the national population in relation to relevant variables, e.g. age, sex, occupation? | 2. Was the sampling frame a true or close representation of the target population? | 3. Was some form of random selection used to select the sample, OR, was a census undertaken? | 4. Was the likelihood of non-response bias minimal? | 5. Were data collected directly from the subjects (as opposed to a proxy)? | 6. Was an acceptable case definition used in the study? | 7. Was the study instrument that measured the parameter of interest (e.g. prevalence of low back pain) shown to have reliability and validity (if necessary)? | 8. Was the same mode of data collection used for all subjects? | 9. Was the length of the shortest prevalence period for the parameter of interest appropriate? | 10. Were the numerator (s) and denominator (s) for the parameter of interest appropriate? | Summary item on the overall risk of study bias |
|-----------|------------------------------------------------------------------------------------------------------------------------------------------------------|------------------------------------------------------------------------------------|----------------------------------------------------------------------------------------------|-----------------------------------------------------|----------------------------------------------------------------------------|---------------------------------------------------------|---------------------------------------------------------------------------------------------------------------------------------------------------------------|----------------------------------------------------------------|------------------------------------------------------------------------------------------------|-------------------------------------------------------------------------------------------|------------------------------------------------|
| 14        | 1                                                                                                                                                    | 0                                                                                  | 1                                                                                            | 0                                                   | 0                                                                          | 0                                                       | 0                                                                                                                                                             | 0                                                              | 0                                                                                              | 0                                                                                         | 2                                              |
| 29        | 1                                                                                                                                                    | 0                                                                                  | 0                                                                                            | 0                                                   | 0                                                                          | 0                                                       | 0                                                                                                                                                             | 0                                                              | 0                                                                                              | 0                                                                                         | 1                                              |
| 15        | 1                                                                                                                                                    | 0                                                                                  | 0                                                                                            | 0                                                   | 0                                                                          | 0                                                       | 0                                                                                                                                                             | 0                                                              | 0                                                                                              | 0                                                                                         | 1                                              |
| 7         | 1                                                                                                                                                    | 0                                                                                  | 0                                                                                            | 0                                                   | 0                                                                          | 0                                                       | 0                                                                                                                                                             | 0                                                              | 0                                                                                              | 0                                                                                         | 1                                              |
| 30        | 1                                                                                                                                                    | 0                                                                                  | 0                                                                                            | 0                                                   | 0                                                                          | 0                                                       | 0                                                                                                                                                             | 0                                                              | 0                                                                                              | 0                                                                                         | 1                                              |
| 31        | 0                                                                                                                                                    | 0                                                                                  | 0                                                                                            | 0                                                   | 0                                                                          | 0                                                       | 0                                                                                                                                                             | 0                                                              | 0                                                                                              | 0                                                                                         | 0                                              |
| 32        | 1                                                                                                                                                    | 0                                                                                  | 0                                                                                            | 0                                                   | 0                                                                          | 0                                                       | 0                                                                                                                                                             | 0                                                              | 0                                                                                              | 0                                                                                         | 1                                              |
| 33        | 1                                                                                                                                                    | 1                                                                                  | 1                                                                                            | 0                                                   | 0                                                                          | 0                                                       | 0                                                                                                                                                             | 0                                                              | 0                                                                                              | 0                                                                                         | 3                                              |
| 34        | 1                                                                                                                                                    | 0                                                                                  | 0                                                                                            | 0                                                   | 0                                                                          | 0                                                       | 0                                                                                                                                                             | 0                                                              | 0                                                                                              | 0                                                                                         | 1                                              |
| 35        | 1                                                                                                                                                    | 0                                                                                  | 0                                                                                            | 0                                                   | 0                                                                          | 0                                                       | 0                                                                                                                                                             | 0                                                              | 0                                                                                              | 0                                                                                         | 1                                              |
| 36        | 1                                                                                                                                                    | 0                                                                                  | 0                                                                                            | 0                                                   | 0                                                                          | 0                                                       | 0                                                                                                                                                             | 0                                                              | 0                                                                                              | 0                                                                                         | 1                                              |
| 37        | 1                                                                                                                                                    | 0                                                                                  | 0                                                                                            | 0                                                   | 0                                                                          | 0                                                       | 0                                                                                                                                                             | 0                                                              | 0                                                                                              | 0                                                                                         | 1                                              |
| 38        | 1                                                                                                                                                    | 0                                                                                  | 0                                                                                            | 0                                                   | 0                                                                          | 0                                                       | 0                                                                                                                                                             | 0                                                              | 0                                                                                              | 0                                                                                         | 1                                              |
| 39        | 1                                                                                                                                                    | 0                                                                                  | 0                                                                                            | 0                                                   | 0                                                                          | 0                                                       | 0                                                                                                                                                             | 0                                                              | 0                                                                                              | 0                                                                                         | 1                                              |
| 40        | 1                                                                                                                                                    | 0                                                                                  | 0                                                                                            | 0                                                   | 0                                                                          | 0                                                       | 0                                                                                                                                                             | 0                                                              | 0                                                                                              | 0                                                                                         | 1                                              |
| 41        | 1                                                                                                                                                    | 0                                                                                  | 0                                                                                            | 0                                                   | 0                                                                          | 0                                                       | 0                                                                                                                                                             | 0                                                              | 0                                                                                              | 0                                                                                         | 1                                              |
| 8         | 1                                                                                                                                                    | 1                                                                                  | 1                                                                                            | 1                                                   | 0                                                                          | 0                                                       | 0                                                                                                                                                             | 0                                                              | 0                                                                                              | 0                                                                                         | 4                                              |
| 42        | 1                                                                                                                                                    | 1                                                                                  | 1                                                                                            | 0                                                   | 0                                                                          | 0                                                       | 0                                                                                                                                                             | 0                                                              | 0                                                                                              | 0                                                                                         | 3                                              |
| 43        | 1                                                                                                                                                    | 0                                                                                  | 0                                                                                            | 0                                                   | 0                                                                          | 0                                                       | 0                                                                                                                                                             | 0                                                              | 0                                                                                              | 0                                                                                         | 1                                              |
| 44        | 1                                                                                                                                                    | 0                                                                                  | 0                                                                                            | 0                                                   | 0                                                                          | 0                                                       | 0                                                                                                                                                             | 0                                                              | 0                                                                                              | 0                                                                                         | 1                                              |
| 45        | 1                                                                                                                                                    | 1                                                                                  | 1                                                                                            | 0                                                   | 0                                                                          | 0                                                       | 0                                                                                                                                                             | 0                                                              | 0                                                                                              | 0                                                                                         | 3                                              |
| 46        | 1                                                                                                                                                    | 0                                                                                  | 1                                                                                            | 0                                                   | 0                                                                          | 0                                                       | 0                                                                                                                                                             | 0                                                              | 0                                                                                              | 0                                                                                         | 2                                              |
| 48        | 1                                                                                                                                                    | 0                                                                                  | 0                                                                                            | 0                                                   | 0                                                                          | 0                                                       | 0                                                                                                                                                             | 0                                                              | 0                                                                                              | 0                                                                                         | 1                                              |
| 49        | 1                                                                                                                                                    | 0                                                                                  | 0                                                                                            | 0                                                   | 0                                                                          | 0                                                       | 0                                                                                                                                                             | 0                                                              | 0                                                                                              | 0                                                                                         | 1                                              |
| 50        | 0                                                                                                                                                    | 0                                                                                  | 0                                                                                            | 0                                                   | 0                                                                          | 0                                                       | 0                                                                                                                                                             | 0                                                              | 0                                                                                              | 0                                                                                         | 0                                              |

|    |   |   |   |   |   |   |   |   |   |   |   |
|----|---|---|---|---|---|---|---|---|---|---|---|
| 51 | 1 | 0 | 1 | 0 | 0 | 0 | 0 | 0 | 0 | 0 | 2 |
| 52 | 1 | 0 | 0 | 0 | 0 | 0 | 0 | 0 | 0 | 0 | 1 |
| 53 | 1 | 0 | 0 | 0 | 0 | 0 | 0 | 0 | 0 | 0 | 1 |
| 54 | 1 | 0 | 0 | 0 | 0 | 0 | 0 | 0 | 0 | 0 | 1 |
| 56 | 1 | 0 | 0 | 0 | 0 | 0 | 0 | 0 | 0 | 0 | 1 |
| 58 | 1 | 0 | 0 | 0 | 0 | 0 | 0 | 0 | 0 | 0 | 1 |
| 59 | 0 | 0 | 0 | 0 | 0 | 0 | 0 | 0 | 0 | 0 | 0 |
| 60 | 0 | 0 | 0 | 0 | 1 | 0 | 0 | 0 | 0 | 0 | 1 |
| 47 | 1 | 0 | 0 | 0 | 1 | 0 | 0 | 0 | 0 | 0 | 2 |
| 55 | 1 | 0 | 0 | 0 | 0 | 0 | 0 | 0 | 0 | 0 | 1 |
| 57 | 1 | 1 | 1 | 0 | 0 | 0 | 0 | 0 | 0 | 0 | 3 |
| 61 | 1 | 0 | 0 | 0 | 0 | 0 | 0 | 0 | 0 | 0 | 1 |
