# Supplementary material
Source: HighWire-hosted journal article supplement (https://bibliotheek.ehb.be/content/suppl/2023/07/14/10.1.e001738)
Supplement: bmjresp-2023-001738supp003_data_supplement.pdf [file bmjresp-2023-001738supp003_data_supplement.pdf]

| Ref.          | Location | Recruitment                                                                                                                                                                                                                                 | N                             | Female (%) | Age (years) | Respiratory diseases assessed    | Assessment method for respiratory diseases                           |                                                                  |                                          | PFT                                                                         |
|---------------|----------|---------------------------------------------------------------------------------------------------------------------------------------------------------------------------------------------------------------------------------------------|-------------------------------|------------|-------------|----------------------------------|----------------------------------------------------------------------|------------------------------------------------------------------|------------------------------------------|-----------------------------------------------------------------------------|
|               |          |                                                                                                                                                                                                                                             |                               |            |             |                                  | COPD                                                                 | Bronchiectasis                                                   | Asthma                                   |                                                                             |
| <sup>29</sup> | TEHS     | Retrospective review of adult AP referred to the sleep specialist/outreach team with OSA (2011-2015)                                                                                                                                        | 297                           | 48.2       | 48±12.5     | COPD                             | EMR                                                                  | -                                                                | -                                        | -                                                                           |
| <sup>14</sup> | TEHS     | Retrospective review of adult AP with a diagnosis of COPD referred to the respiratory outreach team (2012-2016)                                                                                                                             | 380                           | 55.8       | 57.3±13.2   | COPD<br>Bronchiectasis<br>Asthma | EMR                                                                  | EMR                                                              | EMR                                      | Acceptable spirometry in 175 AP                                             |
| <sup>30</sup> | TEHS     | Retrospective review of adult AP with a diagnosis of COPD and with chest radiology available referred to the respiratory outreach team (2012-2016)                                                                                          | 258                           | 49.6       | 58.4±12.1   | COPD<br>Bronchiectasis<br>Asthma | EMR                                                                  | Radiological evidence                                            | EMR                                      | Acceptable spirometry in 122 AP                                             |
| <sup>7</sup>  | TEHS     | Retrospective review of adult patients diagnosed with bronchiectasis (2012-2017)                                                                                                                                                            | 388 total:<br>258 Aboriginal  | 59.3       | 54±14.9     | COPD<br>Bronchiectasis<br>Asthma | EMR                                                                  | Radiological evidence, or those hospitalised with ICD code J4713 | EMR                                      | Acceptable spirometry in 161 patients (does not specify Aboriginal numbers) |
| <sup>15</sup> | TEHS     | Retrospective review of adult AP referred to respiratory outreach team (2013-2015)                                                                                                                                                          | 357                           | 58.2       | 49±12.9     | COPD<br>Bronchiectasis<br>Asthma | GOLD stage 2 or higher                                               | EMR                                                              | EMR                                      | Acceptable spirometry in 150 AP                                             |
| <sup>31</sup> | TEHS     | Retrospective review of adult patients referred to the respiratory specialist/outreach team with acceptable spirometry who had an FEV <sub>1</sub> /FVC ratio <0.7 (2012-2020)                                                              | 1113 total:<br>240 Aboriginal | 47         | 54.7±13.64  | COPD                             | FEV <sub>1</sub> /FVC ratio <0.7                                     | -                                                                | -                                        | Acceptable spirometry in 240 AP                                             |
| <sup>32</sup> | TEHS     | Retrospective review of adult AP referred to the respiratory specialist/outreach team with acceptable spirometry who had an FEV <sub>1</sub> /FVC ratio <0.7 or FEV <sub>1</sub> /FVC ratio <LLN (2012-2020)                                | 253                           | 47         | 54.7±13.63  | COPD<br>Bronchiectasis           | FEV <sub>1</sub> /FVC ratio <0.7 or FEV <sub>1</sub> /FVC ratio <LLN | Radiology evidence                                               | -                                        | Acceptable spirometry in 253 AP                                             |
| <sup>33</sup> | TEHS     | Retrospective review of adult AP referred to the respiratory specialist/outreach team at least twice, with acceptable spirometry performed at both times (2012-2020)                                                                        | 115                           | 50.4       | 50.4±11.1   | COPD<br>Bronchiectasis           | Radiology evidence                                                   | Radiology evidence                                               | -                                        | Acceptable spirometry in 115 AP                                             |
| <sup>34</sup> | TEHS     | Retrospective review of adult AP referred to the respiratory specialist/outreach team with Chest CT or Chest X-ray available which showed either chronic lung disease, or no chronic lung disease and had acceptable spirometry (2012-2020) | 485                           | 55.8       | 50.9±16.5   | COPD<br>Bronchiectasis           | Radiology evidence                                                   | Radiology evidence                                               | -                                        | Acceptable spirometry in 485 AP                                             |
| <sup>35</sup> | TEHS     | Retrospective review of adult patients referred to the respiratory specialist/outreach team with acceptable spirometry (2012-2020)                                                                                                          | 5321 total:<br>742 Aboriginal | 56.9       | 50.7±12.6   | COPD<br>Bronchiectasis<br>Asthma | Radiology evidence or FEV <sub>1</sub> /FVC < 0.7                    | Radiology evidence                                               | BDR (12% and 200ml change or 10% change) | Acceptable spirometry in 742 AP                                             |
| <sup>36</sup> | TEHS     | Retrospective review of adult AP referred to the respiratory specialist/outreach team with Chest CT available (2012-2020)                                                                                                                   | 402                           | 59         | 53.5±40.8   | COPD<br>Bronchiectasis           | CT evidence                                                          | CT evidence                                                      | -                                        | -                                                                           |
| <sup>37</sup> | TEHS     | Retrospective review of adult AP referred to the respiratory specialist/outreach team with Chest                                                                                                                                            | 212                           | 54.3       | 53.1±12.2   | COPD<br>Bronchiectasis           | CT evidence                                                          | CT evidence                                                      | -                                        | Acceptable spirometry in 212 AP                                             |

|               |            |                                                                                                                                                                                                                                                     |                                                                  |      |                                                                                          |                                  |                                     |                                                                                  |                |                                    |
|---------------|------------|-----------------------------------------------------------------------------------------------------------------------------------------------------------------------------------------------------------------------------------------------------|------------------------------------------------------------------|------|------------------------------------------------------------------------------------------|----------------------------------|-------------------------------------|----------------------------------------------------------------------------------|----------------|------------------------------------|
|               |            | CT available which showed either chronic lung disease, or no chronic lung disease and had acceptable spirometry (2012-2020)                                                                                                                         |                                                                  |      |                                                                                          |                                  |                                     |                                                                                  |                |                                    |
| <sup>38</sup> | TEHS       | Retrospective review of adult patients actively receiving DOT (2018-2020)                                                                                                                                                                           | 212 total:<br>45 Aboriginal                                      | 38   | 61±12.4                                                                                  | COPD<br>Bronchiectasis           | EMR                                 | EMR                                                                              | -              | -                                  |
| <sup>39</sup> | TEHS       | Convenience survey of patients currently hospitalised with, or hospitalised previously with and presenting to respiratory team, an exacerbation of COPD (2020-2021)                                                                                 | 86 total:<br>59 Aboriginal                                       | 53   | 56.3±9.8                                                                                 | COPD<br>Bronchiectasis<br>Asthma | ICD coded<br>hospitalisation        | EMR                                                                              | EMR            | Acceptable spirometry in 53 AP     |
| <sup>40</sup> | TEHS       | Retrospective cohort study of adult patients admitted to hospital with a diagnosis of hypomagnesemia (2008-2014)                                                                                                                                    | 876 total:<br>494 Aboriginal                                     | 56.1 | 43.8±16.9                                                                                | COPD<br>Asthma                   | EMR                                 | -                                                                                | EMR            | -                                  |
| <sup>41</sup> | Central AU | Retrospective review of adult AP (≥15 years) who presented to ASH and had a HTLV-1 screening test (2000-2010)                                                                                                                                       | 1451<br>HTLV-1 + <sup>ve</sup> 507<br>HTLV-1 - <sup>ve</sup> 944 | 55.3 | HTLV-1 + <sup>ve</sup> :<br>47.7±13.9<br>HTLV-1 - <sup>ve</sup> :<br>43.9±16.6           | COPD<br>Bronchiectasis<br>Asthma | EMR                                 | ICD-10 coding<br>Definite – confirmed<br>by HRCT. Possible –<br>no HRCT recorded | EMR            | -                                  |
| <sup>8</sup>  | Central AU | Retrospective review of adult patients (≥15 years) whom had a discharge diagnosis of bronchiectasis via ASH (Aboriginal Australian), MMC (non-Aboriginal Australian) or MH (Māori, Pacific Islanders and non-Aboriginal New Zealanders) (2004-2008) | 406 total:<br>85 Aboriginal                                      | 42.4 | 43.7±12.3                                                                                | Bronchiectasis                   | -                                   | HRCT                                                                             | -              | Acceptable spirometry in 54% of AP |
| <sup>42</sup> | Central AU | Case-control study of adult AP (≥15 years) who were admitted to ASH with a blood culture pathogen isolated (case) or admitted without infection to surgical or renal units, or for cardiac investigation and were positive for HTLV-1 (2008-2009)   | 74<br>44 cases<br>30 controls                                    | 57   | Case: 51.3±12.3<br>Control: 47.2±10.1                                                    | COPD<br>Bronchiectasis           | EMR                                 | EMR                                                                              | -              | -                                  |
| <sup>43</sup> | Central AU | Retrospective review of adult AP (≥15 years) who presented to ASH with an infective exacerbation of bronchiectasis (case) or for a non-respiratory reason with no evidence of LRTI (control) and had a HTLV-1 screening test (2008-2010)            | 72                                                               | 30.6 | Case: 43.5±71.4<br>Control: 46.1±75.6                                                    | COPD<br>Bronchiectasis<br>Asthma | EMR                                 | HRCT,<br>bronchoscopy and/or<br>bronchography                                    | EMR            | -                                  |
| <sup>44</sup> | Central AU | Retrospective review of adult AP (≥15 years) who presented to ASH with a discharge diagnosis of bronchiectasis (case) or for a non-respiratory reason with no evidence of LRTI (control) and had a HTLV-1 screening test (2008-2013)                | 840                                                              | 42.6 | No HTLV-1:<br>46.2±15.3<br>Low HTLV-1 PVL:<br>51.6±13.7<br>High HTLV-1 PVL:<br>51.1±13.8 | COPD<br>Bronchiectasis           | EMR and<br>radiological<br>evidence | HRCT                                                                             | -              | -                                  |
| <sup>45</sup> | Central AU | Retrospective review of adult AP (≥18 years) who presented to ASH with a diagnosis of bronchiectasis (case) or for a non-respiratory reason with no history of CLD (control) and had a HTLV-1 screening test (2010-2013)                            | 240                                                              | 40   | -                                                                                        | COPD<br>Bronchiectasis<br>Asthma | EMR and<br>radiological<br>evidence | HRCT                                                                             | EMR and<br>BDR | -                                  |
| <sup>46</sup> | Central AU | Community based survey of seven remote Aboriginal communities including all Aboriginal community members aged >2,                                                                                                                                   | 415                                                              | 54.7 | Female HTLV-1 + <sup>ve</sup> :<br>44.6±14.5<br>Female HTLV-1 - <sup>ve</sup> :          | Bronchiectasis                   | -                                   | HRCT                                                                             | -              | -                                  |

|               |                        |                                                                                                                                                          |                                                                                    |                         |                                                                                                     |                                  |                                                                 |            |                                                                       |                                                                                                 |
|---------------|------------------------|----------------------------------------------------------------------------------------------------------------------------------------------------------|------------------------------------------------------------------------------------|-------------------------|-----------------------------------------------------------------------------------------------------|----------------------------------|-----------------------------------------------------------------|------------|-----------------------------------------------------------------------|-------------------------------------------------------------------------------------------------|
|               |                        | incorporating a questionnaire, physical exam, spirometry, blood tests and review of EMRs (2014-2018)                                                     |                                                                                    |                         | 40.4±14.5<br>Male HTLV-1 + <sup>ve</sup> :<br>42.6±14.7<br>Male HTLV-1 - <sup>ve</sup> :<br>32.7±12 |                                  |                                                                 |            |                                                                       |                                                                                                 |
| <sup>47</sup> | NT                     | Historical cohort study of adult (≥ 15 years) Aboriginal residents of remote communities who presented to primary healthcare or hospital (2002-2011)     | 14,184                                                                             | 56                      | 15-29: 45.1<br>30-39: 24.3<br>40-49: 15.6<br>50-59: 8.3<br>≥60: 6.7                                 | COPD                             | Primary care<br>ICPC codes or<br>hospital AR-<br>DRG codes      | -          | -                                                                     | -                                                                                               |
| <sup>48</sup> | N. QLD                 | Retrospective review of adult patients referred to the Aboriginal respiratory outreach care team (2012-2020)                                             | 1734 total:<br>1117 Aboriginal                                                     | 62                      | 54.7±14.1                                                                                           | COPD<br>Bronchiectasis<br>Asthma | EMR                                                             | EMR        | EMR                                                                   | Acceptable spirometry in<br>1117 AP                                                             |
| <sup>49</sup> | S. QLD                 | Retrospective cohort of pregnant women of singletons presenting to MMH (2008-2019)                                                                       | 110057 total:<br>4675 Aboriginal                                                   | 100                     | <20 – 11%<br>20-34 – 75.7%<br>≥34 – 13.3%                                                           | Asthma                           | -                                                               | -          | EMR                                                                   |                                                                                                 |
| <sup>50</sup> | Kimberley<br>region WA | Random household sampling in Broome, total population sampling in very remote communities of permanent residents aged ≥40 years (2008-2012)              | 823 total:<br>328 Aboriginal                                                       | 56.4                    | 51.8±9.3                                                                                            | COPD<br>Asthma                   | Self-reported<br>chronic<br>bronchitis,<br>emphysema or<br>COPD | -          | Self-reported<br>asthma or<br>asthmatic<br>bronchitis                 | Acceptable spirometry in 253<br>AP                                                              |
| <sup>51</sup> | Kimberley<br>region WA | Retrospective cohort study of adult patients with a bronchiectasis hospital admission (2011-2016)                                                        | 32 total:<br>23 Aboriginal                                                         | 41<br>(total<br>cohort) | 49.9±10.4 (total<br>cohort)                                                                         | Bronchiectasis                   | -                                                               | ICD coding | -                                                                     | Acceptable spirometry<br>recorded in 5 patients (Did<br>not break down by Aboriginal<br>status) |
| <sup>52</sup> | WA                     | Prospective cohort study of all Aboriginal mother/baby dyads (singleton, born >20 weeks gestation) (2001-2013)                                           | 12,323 mothers                                                                     | 100                     | <20 – 20.6%<br>20-24 – 24%<br>25-29 – 32.8%<br>≥30 – 22.6%                                          | Asthma                           | -                                                               | -          | Self-reported<br>or hospital<br>admission with<br>ICD coded<br>asthma | -                                                                                               |
| <sup>53</sup> | WA                     | Longitudinal cohort of patients who had at least one presentation with either Heart failure, type 2 diabetes or COPD during the study period (2002-2014) | Cardinal events,<br>not ‘patients’<br>assessed.<br>43300 total:<br>3431 Aboriginal | -                       | Age at cardinal event:<br>COPD: 57.2±14.6                                                           | COPD                             | ICD coded<br>emergency<br>department<br>presentation            | -          | -                                                                     | -                                                                                               |
| <sup>54</sup> | WA                     | Retrospective review of patients admitted to hospital with a principal diagnosis of acute coronary syndrome, discharged alive (2002-2004)                | 1717 total:<br>499 Aboriginal                                                      | 43.1                    | 53±13                                                                                               | COPD/asthma                      | EMR (COPD<br>including<br>asthma)                               | -          | EMR (COPD<br>including<br>asthma)                                     | -                                                                                               |
| <sup>55</sup> | WA                     | Retrospective review of stroke patients (aged 25-84 years) (2007-2011 using a 20 year look back period)                                                  | 67,956 total:<br>3,184<br>Aboriginal                                               | 50.9                    | 25-34: 4.6<br>35-44: 12.9<br>45-54: 20.4<br>55-64: 26.7<br>65-74: 22<br>75-84: 13.4                 | COPD                             | Hospital<br>admission<br>coded to<br>COPD<br>diagnosis field    | -          | -                                                                     | -                                                                                               |
| <sup>56</sup> | SA                     | Retrospective review of AP with cancer matched to non-AP with cancer (1990-2010)                                                                         | 777                                                                                | 51.7                    | 57.7±15.6                                                                                           | COPD                             | ICD coded<br>hospital<br>admissions                             | -          | -                                                                     | -                                                                                               |

|                                                                                                                                                                                                                                                                                                                                                                                                                                                                                                                                                                                                                                                                                                                                                                                                                                                                                                                                                                                                                                                                                        |           |                                                                                                                                                                                                                                             |                                                                     |      |                                              |                |                               |   |                                                                                                                     |   |
|----------------------------------------------------------------------------------------------------------------------------------------------------------------------------------------------------------------------------------------------------------------------------------------------------------------------------------------------------------------------------------------------------------------------------------------------------------------------------------------------------------------------------------------------------------------------------------------------------------------------------------------------------------------------------------------------------------------------------------------------------------------------------------------------------------------------------------------------------------------------------------------------------------------------------------------------------------------------------------------------------------------------------------------------------------------------------------------|-----------|---------------------------------------------------------------------------------------------------------------------------------------------------------------------------------------------------------------------------------------------|---------------------------------------------------------------------|------|----------------------------------------------|----------------|-------------------------------|---|---------------------------------------------------------------------------------------------------------------------|---|
| <sup>57</sup>                                                                                                                                                                                                                                                                                                                                                                                                                                                                                                                                                                                                                                                                                                                                                                                                                                                                                                                                                                                                                                                                          | SA        | Retrospective review of patients on warfarin anticoagulation therapy identified from clinical and administrative databases at the RAH (1999-2012)                                                                                           | 512 total:<br>88 Aboriginal                                         | 46.6 | 51±13                                        | COPD           | EMR                           | - | -                                                                                                                   | - |
| <sup>58</sup>                                                                                                                                                                                                                                                                                                                                                                                                                                                                                                                                                                                                                                                                                                                                                                                                                                                                                                                                                                                                                                                                          | Victoria  | State-wide phone survey of randomly selected adults (2008)                                                                                                                                                                                  | 34168 total:<br>339 Aboriginal                                      | -    | -                                            | Asthma         | -                             | - | Self-reported if the patient had in the last 12 months, or ever in the past been diagnosed with asthma by a doctor. | - |
| <sup>59</sup>                                                                                                                                                                                                                                                                                                                                                                                                                                                                                                                                                                                                                                                                                                                                                                                                                                                                                                                                                                                                                                                                          | NSW       | Quasi experimental study of AP adults (> 45 years) eligible for registering for the ‘Closing the Gap’ co-payment incentive and linked data from the “45 and Up Study” (2006-2014)                                                           | 1,948                                                               | 56.9 | Registered: 56±7.8<br>Unregistered: 58.3±9.3 | Asthma         | -                             | - | Self-reported if the participant has ever been told they have asthma by a doctor.                                   | - |
| <sup>60</sup>                                                                                                                                                                                                                                                                                                                                                                                                                                                                                                                                                                                                                                                                                                                                                                                                                                                                                                                                                                                                                                                                          | Australia | Observational time trend study of Aboriginal adults (>15 years) presenting to hospital with asthma, COPD, hypertension, heart failure or other cardiovascular event in selected pharmaceutical benefits scheme sentinel regions (2009-2011) | Recorded hospital presentations<br>109583 total:<br>4596 Aboriginal | -    | -                                            | COPD<br>Asthma | ICD coded hospital admissions | - | ICD coded hospital admissions                                                                                       | - |
| <sup>61</sup>                                                                                                                                                                                                                                                                                                                                                                                                                                                                                                                                                                                                                                                                                                                                                                                                                                                                                                                                                                                                                                                                          | Australia | Retrospective review of Adult AP involved in the Kanyini Guidelines Adherence with the polypill randomised controlled trial recruited from 33 primary healthcare centres across Australia (2009-2013)                                       | 535 total:<br>249 Aboriginal                                        | 42.2 | Urban/regional:<br>57±8.8<br>Remote: 55±13.6 | COPD           | Not stated                    | - | -                                                                                                                   | - |
| Abbreviations: AR-DRG, Australian refined diagnosis related groups; ASH, Alice Springs Hospital; AU, Australia; BDR, Bronchodilator response; COPD, Chronic obstructive pulmonary disease; CT, Computed tomography; DOT, Domiciliary oxygen therapy; EMR, Electronic medical record; FEV <sub>1</sub> , Forced expiratory volume in one second; FVC, Forced vital capacity; GOLD, Global initiative for chronic obstructive lung disease; HRCT, High resolution computed tomography; HTLV-1, Human T-Lymphotropic Virus type 1; ICD, International classification of disease coding; ICPC, International classification of primary care; AP, Aboriginal patients; LLN, Lower limit of normal; MH, Middlesmore hospital; MMC, Monash medical centre; LRTI, Lower tract respiratory infection; MMH, Mater mothers hospital; N. QLD, North Queensland; OSA, Obstructive sleep apnoea; PFT, Pulmonary function test; PVL, Proviral load; RAH, Royal Adelaide hospital; Ref., Reference; SA, South Australia; S. QLD, South Queensland; TEHS, Top end health service; WA, Western Australia |           |                                                                                                                                                                                                                                             |                                                                     |      |                                              |                |                               |   |                                                                                                                     |   |

Supplemental 3. Outline of studies included for analysis
