# Supplementary material
Source: HighWire-hosted journal article supplement (https://bibliotheek.ehb.be/content/suppl/2023/07/14/10.1.e001738)
Supplement: bmjresp-2023-001738supp006_data_supplement.pdf [file bmjresp-2023-001738supp006_data_supplement.pdf]

Supplemental 6. Symptoms and dyspnoea associated with COPD

| Ref                                                            | Symptoms reported       |                      |           |            |           |             | MRC Dyspnoea scale |       |       |       |       |       |
|----------------------------------------------------------------|-------------------------|----------------------|-----------|------------|-----------|-------------|--------------------|-------|-------|-------|-------|-------|
| .                                                              | Shortness of breath (%) | Productive cough (%) | Cough (%) | Wheeze (%) | Fever (%) | Fatigue (%) | 0 (%)              | 1 (%) | 2 (%) | 3 (%) | 4 (%) | 5 (%) |
| <sup>14</sup>                                                  | 62.5                    | 30                   | 23        | 27         | -         | -           | 23.3               | 31.6  | 27    | 15.8  | 2.4   | 0     |
| <sup>30</sup>                                                  | 77.6                    | 29.9                 | 26.8      | 14.2       | -         | -           | -                  | -     | -     | -     | -     | -     |
| <sup>39</sup>                                                  | 81.5                    | 24.6                 | 61.5      | 12.3       | 36.9      | 30.8        | -                  | -     | -     | -     | -     | -     |
| <sup>50</sup>                                                  | -                       | -                    | 49.4      | 36.4       | -         | -           | 19.4               | 33.9  | 11.3  | 17.1  | 14    | 4.3   |
| Abbreviations: MRC, Medical research council; Ref., Reference. |                         |                      |           |            |           |             |                    |       |       |       |       |       |
