# Supplementary material
Source: HighWire-hosted journal article supplement (https://bibliotheek.ehb.be/content/suppl/2023/07/14/10.1.e001738)
Supplement: bmjresp-2023-001738supp007_data_supplement.pdf [file bmjresp-2023-001738supp007_data_supplement.pdf]

Within PubMed the following keywords were utilised: (((Aboriginal) OR (Indigenous) OR (First Nations) OR (Aboriginal and Torres Strait Islander people (ATSI)) AND (Australian) AND ((lung health) OR (lung disease) OR (Pulmonary health) OR (pulmonary disease) OR (respiratory health) OR (respiratory disease) OR (copd) OR (bronchiectasis) OR (asthma) OR (lung function) OR (pulmonary function)))) NOT (American) NOT (Alaskan) NOT (children) NOT (paediatric)

Within Scopus the following strategy was used: TITLE-ABS-KEY (((Aboriginal OR Indigenous OR (First AND Nations) OR ATSI) AND (Australian)) AND ((lung AND health) OR (lung AND disease) OR (pulmonary AND health) OR (pulmonary AND disease) OR (respiratory AND health) OR (respiratory AND disease) OR copd OR bronchiectasis OR asthma OR (lung AND function) OR (pulmonary AND function)) AND NOT (American OR Alaskan OR children OR paediatric))

In both databases a time limit from 1 January 2012 to 1 October 2022 was set.
